# Supplementary material for: Performance bonuses and the quality of primary health care delivered by family health teams in Brazil: A difference-in-differences analysis
Source: PLoS Med. 2022 Jul 7;19(7):e1004033. doi: 10.1371/journal.pmed.1004033 (PMC9262241; doi:10.1371/journal.pmed.1004033)
Supplement: S1 Data — (XLSX) [file pmed.1004033.s015.xlsx]

## Sheet: Fig1 Unmatched sample
Round	Bonus	Mean	SE	LCI	UCI			Round 1	Round 3	Change from round 1 to 3	Unadjusted difference in differences
Round 1	No bonus	60.684	1.05928	58.6072	62.761		No bonus	60.684	59.4829	-1.20115	0 (base)
Round 1	Bonus	61.4156	0.362958	60.7039	62.1272		Any bonus	61.4156	64.549	3.13341	4.33456
Round 1	1 to 20%	61.5675	0.54184	60.5052	62.6299		1 to 20%	61.5675	62.9303	1.36276	2.56391
Round 1	21 to 50%	61.0757	0.639566	59.8217	62.3296		21 to 50%	61.0757	66.5198	5.44417	6.64532
Round 1	More than 50%	60.0802	1.51856	57.1028	63.0575		More than 50%	60.0802	67.2354	7.15523	8.35638
Round 3	No bonus	59.4829	0.646994	58.2144	60.7514
Round 3	Bonus	64.549	0.648111	63.2783	65.8197
Round 3	1 to 20%	62.9303	1.39769	60.1899	65.6707
Round 3	21 to 50%	66.5198	0.830623	64.8912	68.1484
Round 3	More than 50%	67.2354	1.17775	64.9262	69.5446
