# Supplementary material for: Performance bonuses and the quality of primary health care delivered by family health teams in Brazil: A difference-in-differences analysis
Source: PLoS Med. 2022 Jul 7;19(7):e1004033. doi: 10.1371/journal.pmed.1004033 (PMC9262241; doi:10.1371/journal.pmed.1004033)
Supplement: S2 Data — (XLSX) [file pmed.1004033.s016.xlsx]

## Sheet: Fig2 Matched sample
Round	Bonus Group	Mean	SE	LCI	UCI			Round 1	Round 3	Change from round 1 to 3	Unadjusted difference in differences
Round 1	No bonus	61.5109	1.41825	58.7298	64.2921		No bonus	61.5109	59.8625	-1.6484	0 (base)
Round 1	Any bonus	61.2857	0.41574	60.4705	62.101		Any bonus	61.2857	63.9713	2.6856	4.334
Round 1	1 to 20%	61.5613	0.633113	60.3197	62.8028		1 to 20%	61.5613	62.4643	0.90303	2.55143
Round 1	21 to 50%	60.6632	0.716141	59.2589	62.0675		21 to 50%	60.6632	65.726	5.0628	6.7112
Round 1	More than 50%	59.8936	1.70287	56.5543	63.2329		More than 50%	59.8936	66.8846	6.99099	8.63939
Round 3	No bonus	59.8625	0.88865	58.1199	61.6052
Round 3	Any bonus	63.9713	0.734415	62.5311	65.4115
Round 3	1 to 20%	62.4643	1.66942	59.1906	65.738
Round 3	21 to 50%	65.726	0.904573	63.9522	67.4998
Round 3	More than 50%	66.8846	1.28882	64.3573	69.412
